# Supplementary material for: Antimicrobial Biomaterial on Sutures, Bandages and Face Masks with Potential for Infection Control
Source: MDPI journal article supplement (doi:10.3390/polym14101932), 2022-05-10
Supplement: s1 [file s1]

# **Antimicrobial Biomaterial on Sutures, Bandages and Face Masks with Potential for Infection Control**

**Zehra Edis <sup>1, 2,\*</sup>, Samir Haj Bloukh <sup>2,3</sup> , Hamed Abu Sara <sup>2,3</sup> and Nur Izyan Wan Azalee <sup>4</sup>**

**Supplementary material in the article**

Already added as pdf into zip file

Supplement S1-Bandage TCA area 1-coiled fibers part

And

Supplement S2-Bandage TCA area 2-ordered fibers part

Please see the provided pdf files.

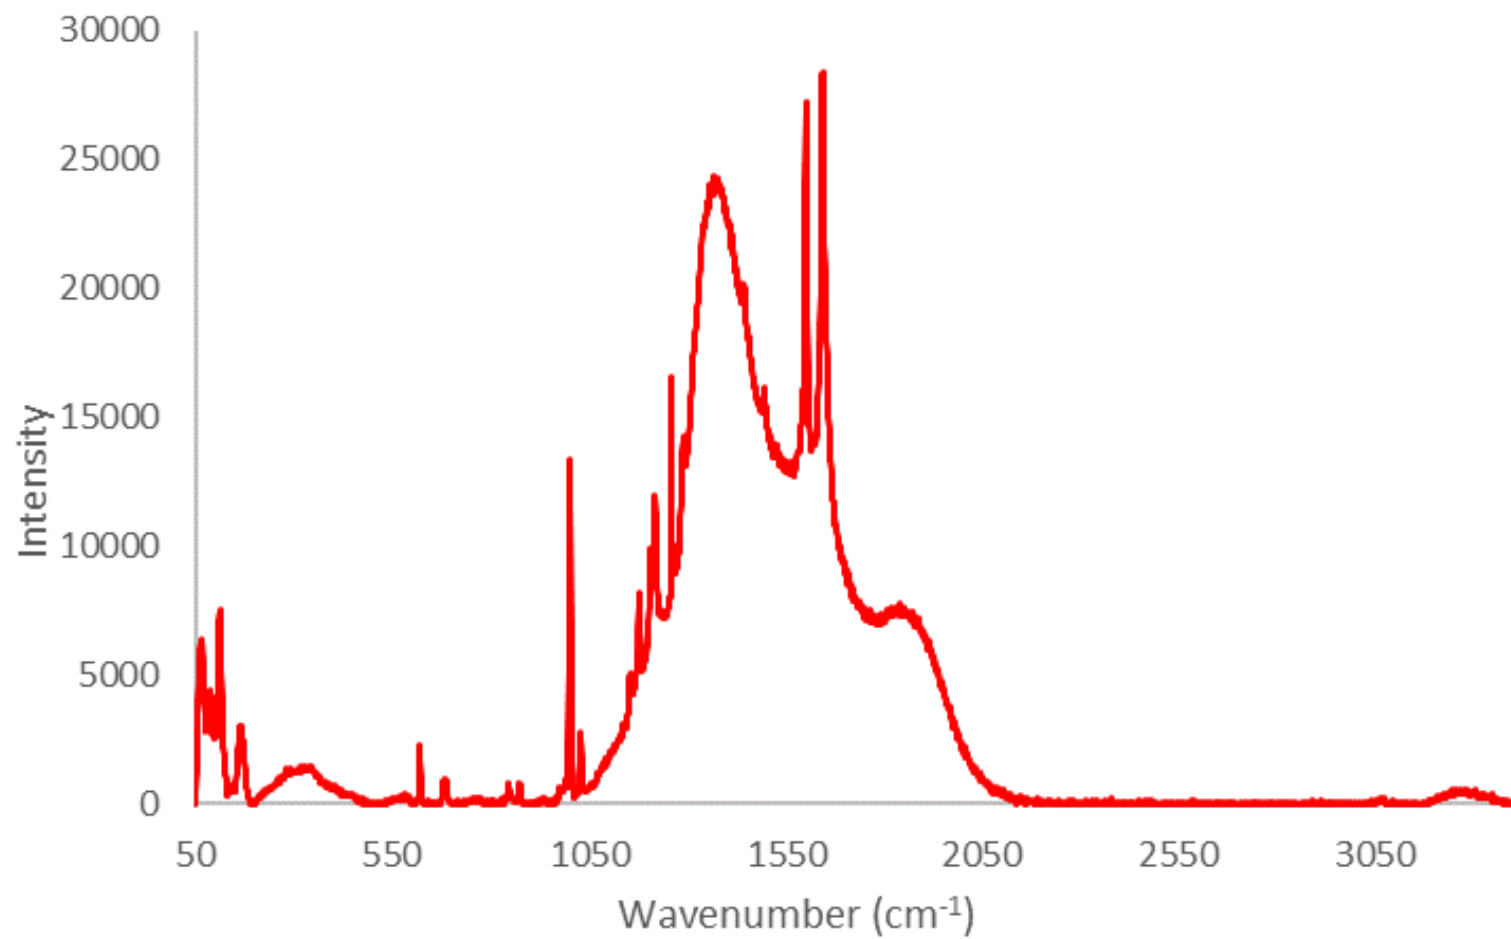

Supplement S3 Raman AV-PVP-TCA-I2

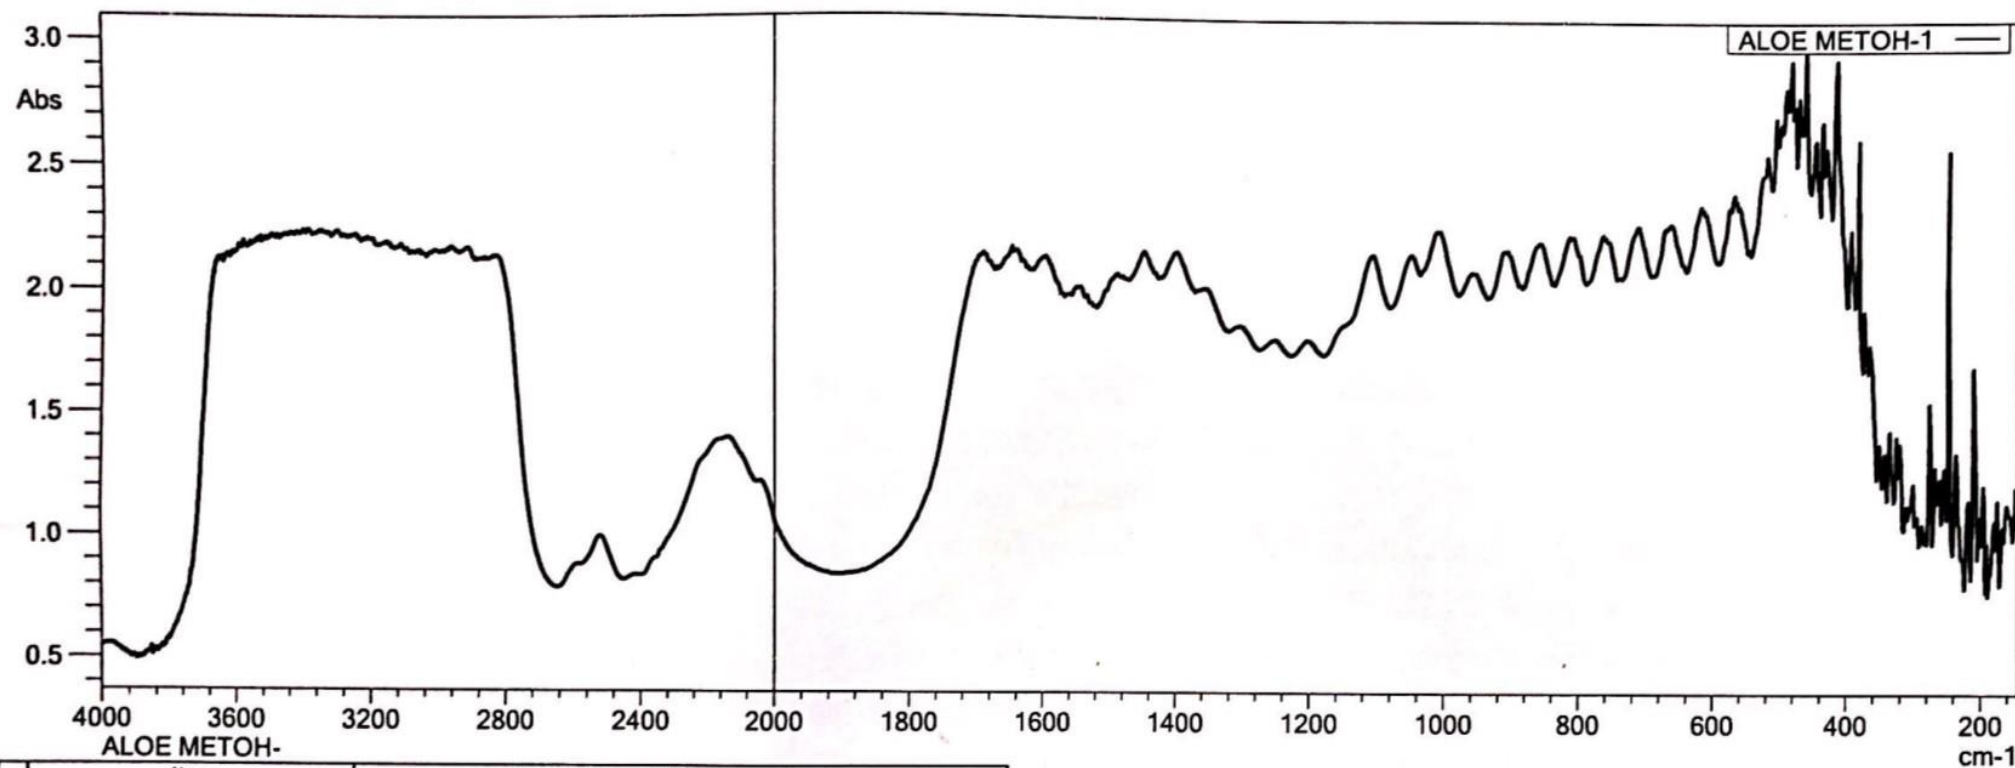

| Item               | Value                                         |
|--------------------|-----------------------------------------------|
| Acquired Date&Time | 11/13/2019 1:01:38 PM                         |
| Filename           | C:\Users\ADMIN\Desktop\Edis\ALOE METOH-1.ispd |
| Spectrum name      | ALOE METOH-1                                  |
| Sample name        | Relyx ultimate pilot                          |
| Sample ID          |                                               |
| Comment            | ALOE METOH-                                   |
| No. of Scans       | 24                                            |
| Resolution         | 4 [cm-1]                                      |

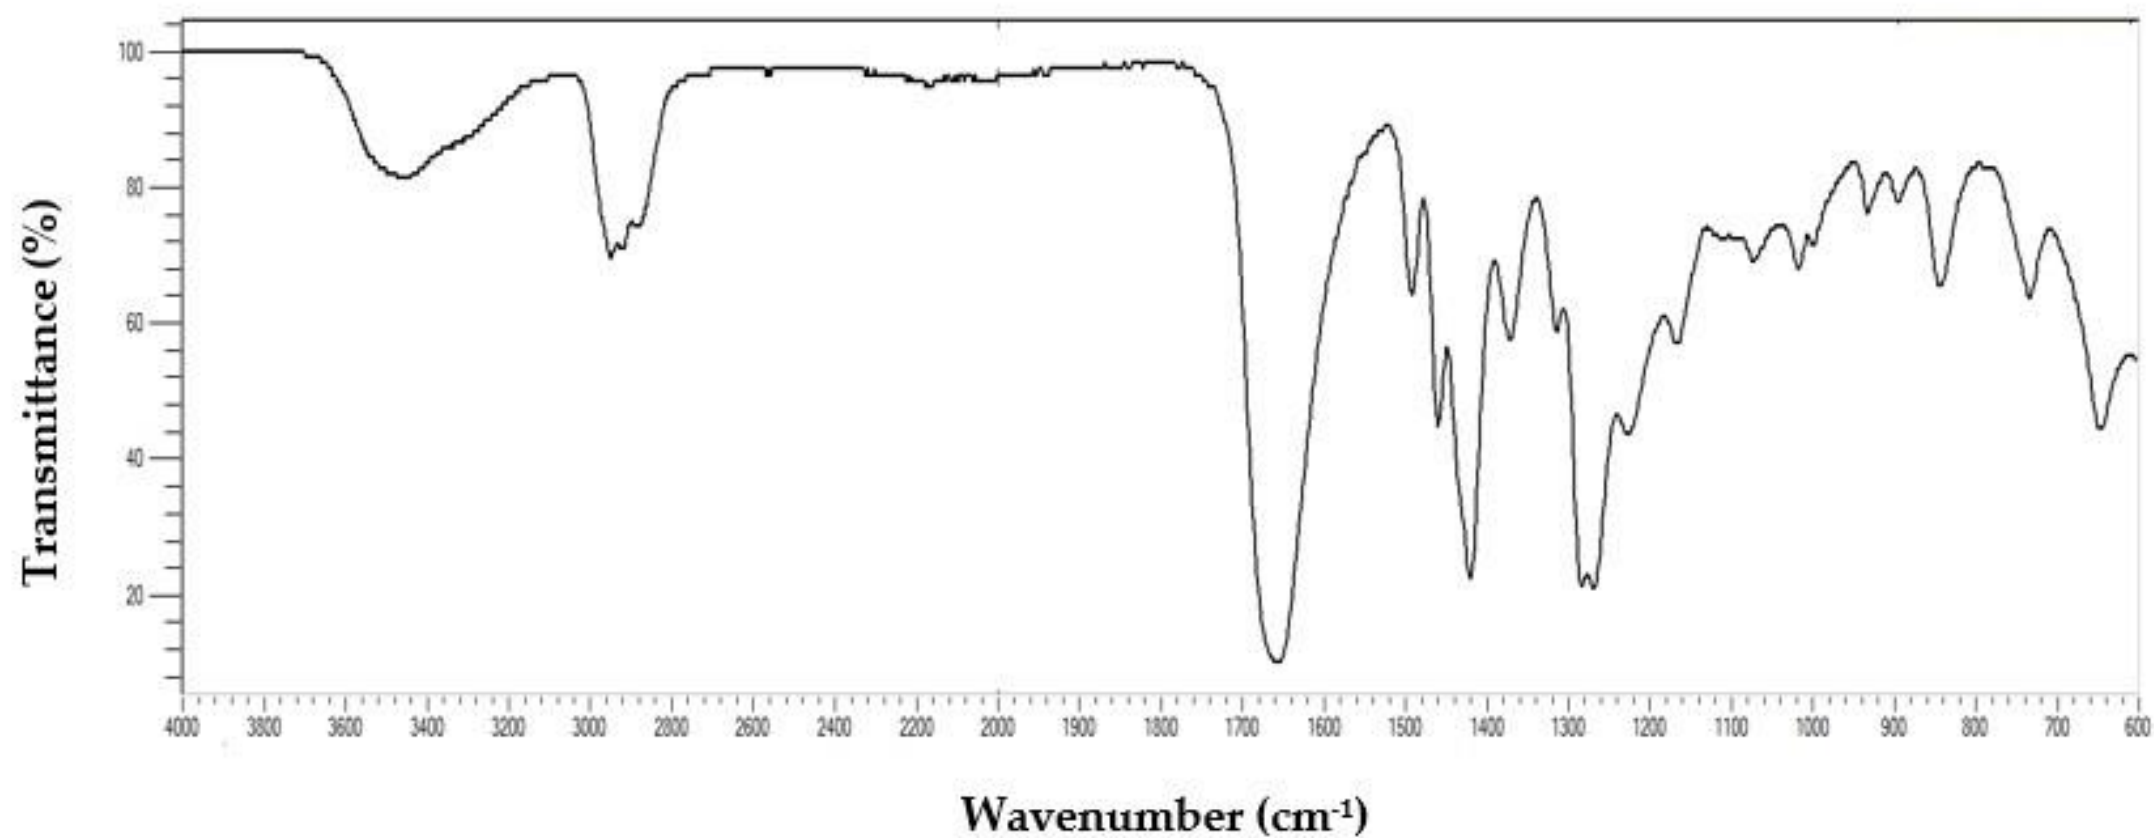

Supplement S5 PVPI FTIR
