# Supplementary material for: Antimicrobial Biomaterial on Sutures, Bandages and Face Masks with Potential for Infection Control
Source: Polymers (Basel). 2022 May 10;14(10):1932. doi: 10.3390/polym14101932 (PMC9143446; doi:10.3390/polym14101932)
Supplement: Supplementary file 1 [file polymers-14-01932-s001.zip]

Archive with 7 entries (7 files):
- Presentation Supplementary material.pdf
- Suplement Figure S1-Bandage TCA area 1-coiled fibers part.pdf
- Suplement Figure S2-Bandage TCA area 2-ordered fibers part.pdf
- Supplement Figure S3 Raman full new.jpg
- Supplement Figure S3 Raman full w TCA.jpg
- Supplement Figure S4 AV FTIR.jpg
- Supplement Figure S5 PVPI FTIR.jpg
