# Supplementary figures and images for: Antimicrobial Biomaterial on Sutures, Bandages and Face Masks with Potential for Infection Control
Source: MDPI journal article supplement (doi:10.3390/polym14101932), 2022-05-10

Electron Image 1

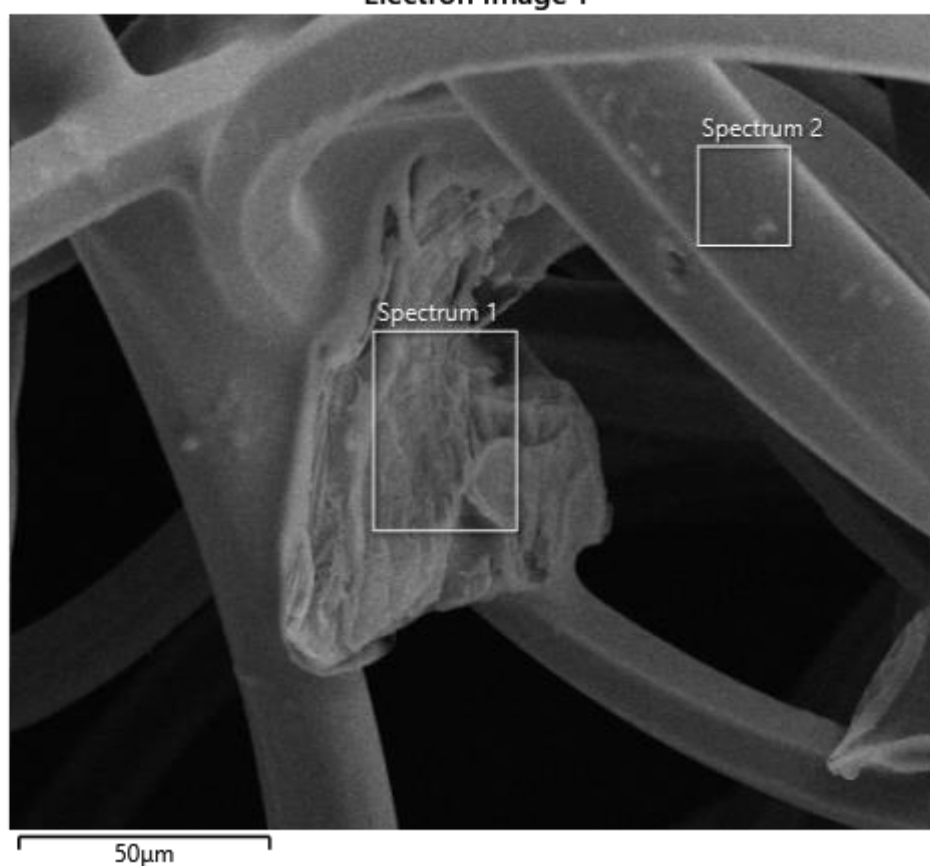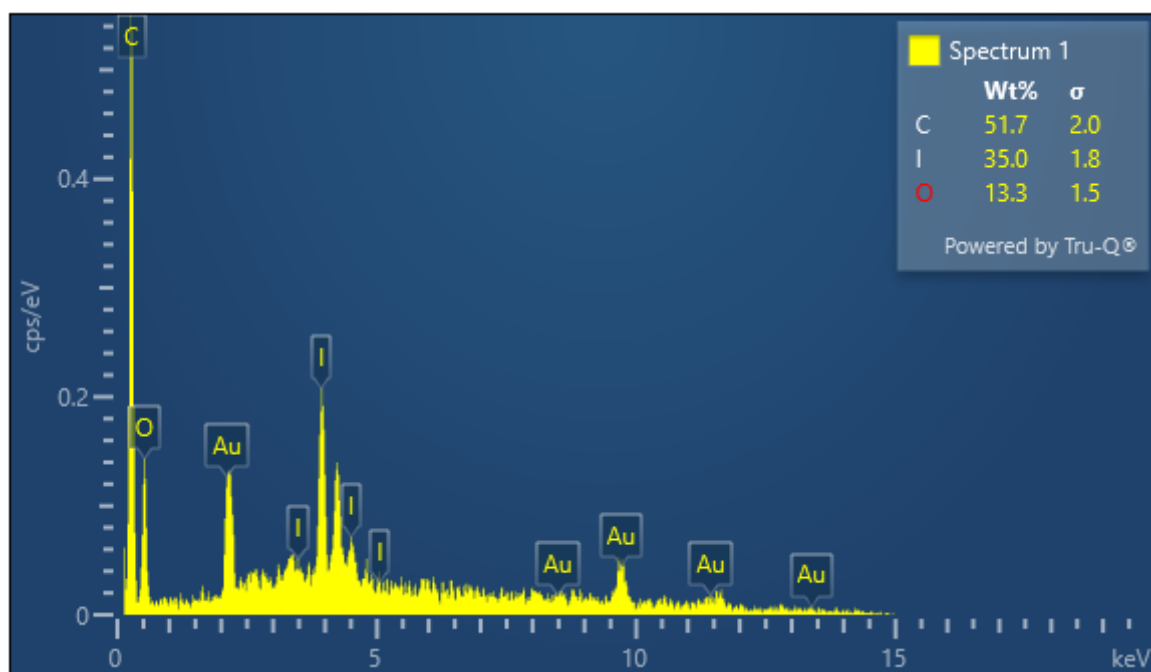

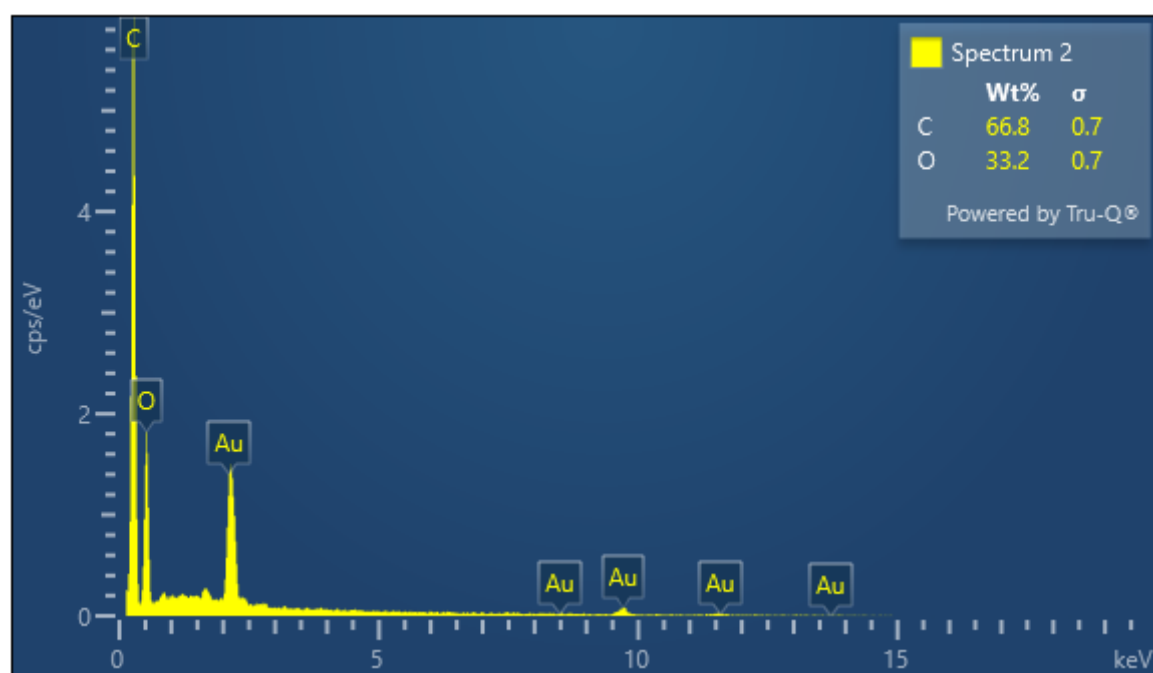

Supplement: s1 [file s1]

Electron Image 7

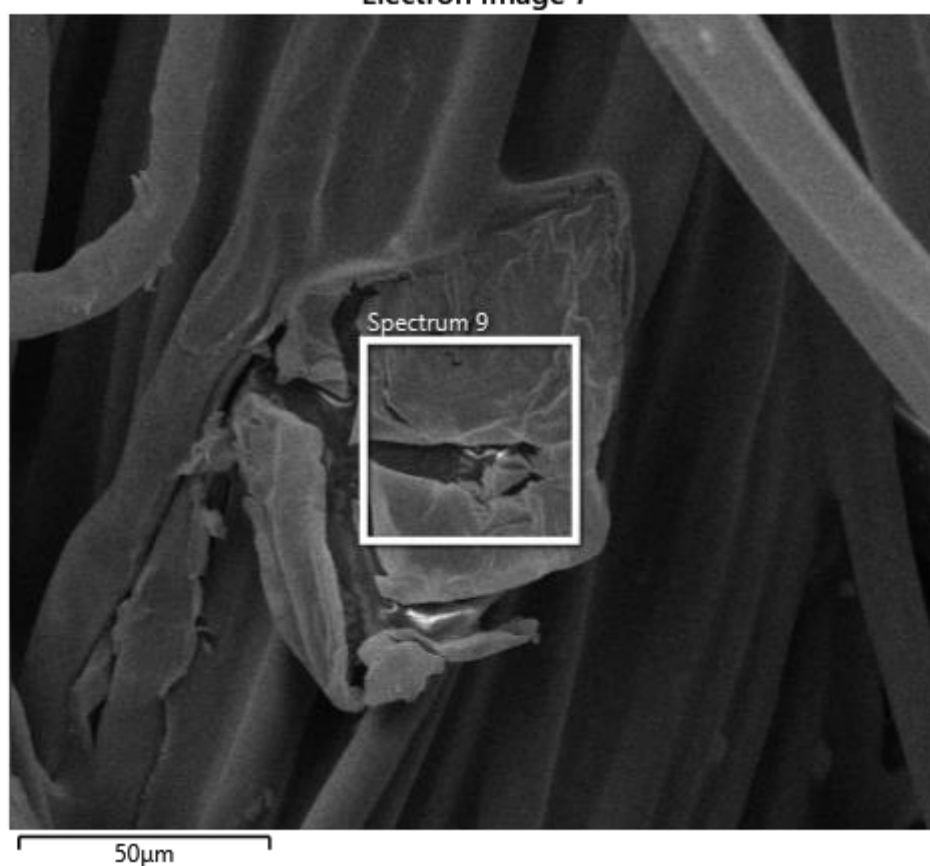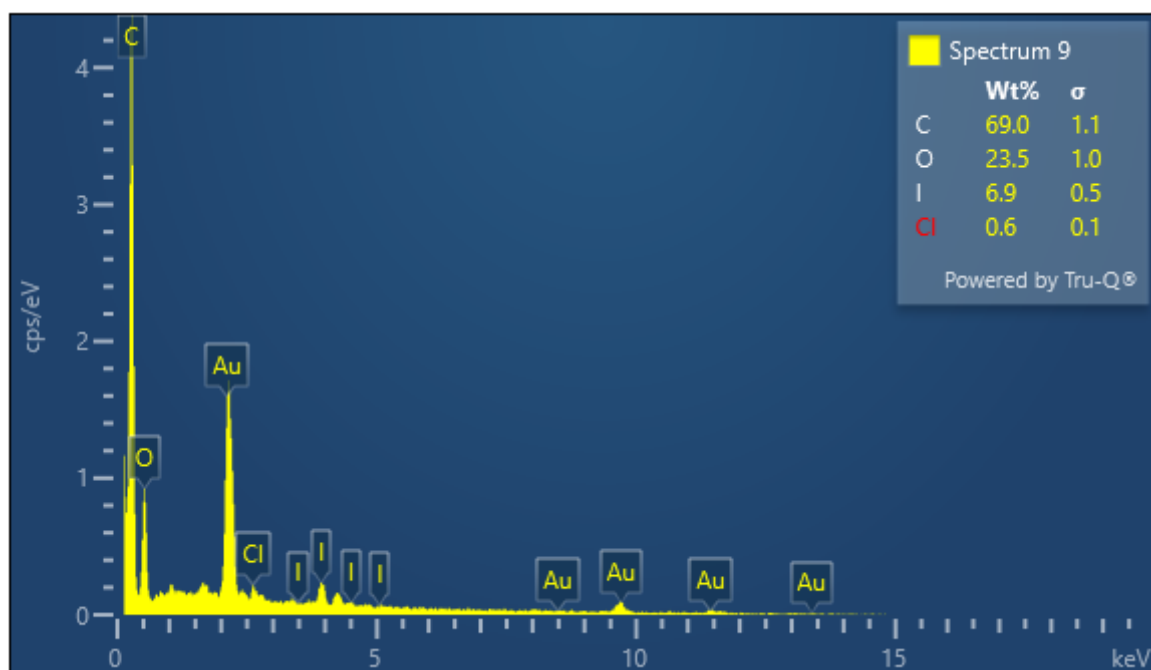

Supplement: s1 [file s1]
